# Supplementary material for: Comparison of common outcome measures for assessing independence in patients diagnosed with disorders of consciousness: A Traumatic Brain Injury Model Systems Study
Source: bioRxiv or medRxiv preprint supplement (doi:10.1101/2022.02.04.22270464), 2022-02-06
Supplement: Supplementary file [file media-1.pdf]

**Comparison of common outcome measures for assessing independence in patients diagnosed with disorders of consciousness: A Traumatic Brain Injury Model Systems Study**

**SUPPLEMENTARY MATERIAL**

Samuel B. Snider MD<sup>1</sup>, Robert G. Kowalski, MBBCh, MS<sup>2</sup>, Flora Hammond MD<sup>3</sup>, Saef Izzy MD<sup>1</sup>, Shirley L. Shih MD<sup>4</sup>, Craig Rovito MD<sup>4</sup>, Brian L. Edlow MD<sup>5</sup>, Ross D. Zafonte DO<sup>4</sup>, Joseph T. Giacino PhD<sup>4</sup>, Yelena G. Bodien PhD<sup>4,5</sup>

**Affiliations**

1 Division of Neurocritical Care, Department of Neurology, Brigham and Women's Hospital, Boston MA, USA

2 Departments of Neurosurgery and Neurology, University of Colorado School of Medicine, Aurora CO

3 Department of Physical Medicine and Rehabilitation, Indiana University School of Medicine, Indianapolis, IN, USA

4 Department of Physical Medicine and Rehabilitation, Spaulding Rehabilitation Hospital and Harvard Medical School, Charlestown, MA

5 Center for Neurotechnology and Neurorecovery, Department of Neurology, Massachusetts General Hospital and Harvard Medical School, Boston, MA

**Supplementary Table 1:** FIM-dependency classification performance measures

| Measure                   | Definition           | Explanation in context of GOSE $\leq 3$ cutpoint     |
|---------------------------|----------------------|------------------------------------------------------|
| Sensitivity               | $\frac{TP}{TP + FN}$ | % of patients with FIM $< 80$ who are GOSE $\leq 3$  |
| Specificity               | $\frac{TN}{TN + FP}$ | % of patients with FIM $\geq 80$ who are GOSE $> 3$  |
| Positive Predictive Value | $\frac{TP}{TP + FP}$ | % of patients with GOSE $\leq 3$ who have FIM $< 80$ |
| Negative Predictive Value | $\frac{TN}{TN + FN}$ | % of patients with GOSE $> 3$ who have FIM $\geq 80$ |

**Terms/Abbreviations:**

TP = True Positive: GOSE  $\leq 3$  & FIM  $< 80$

FP = False Positive: GOSE  $\leq 3$  & FIM  $\geq 80$

TN = True Negative: GOSE  $> 3$  & FIM  $\geq 80$

FN = False Negative: GOSE  $> 3$  & FIM  $< 80$
